# Supplementary material for: Olivine-rich achondrites from Vesta and the missing mantle problem
Source: PubMed Central journal article supplement (PMC8440560; doi:10.1038/s41467-021-25808-9), 2021-09-14
Supplement: 41467_2021_25808_MOESM3_ESM.pdf [file 41467_2021_25808_MOESM3_ESM.pdf]

## **Description of Additional Supplementary Files**

File name: Supplementary Data 1

Description: Microprobe data, major and trace element analyses, highly siderophile element analyses, and isotopic analyses for ultramafic achondrites.
